# Supplementary material
Source: Springer Nature journal article supplement (https://www.springermedizin.de/resource/supplementary/12885_2007_994_MOESM3_ESM.pdf/9471858)

# Reversible amenorrhea and disease-free survival

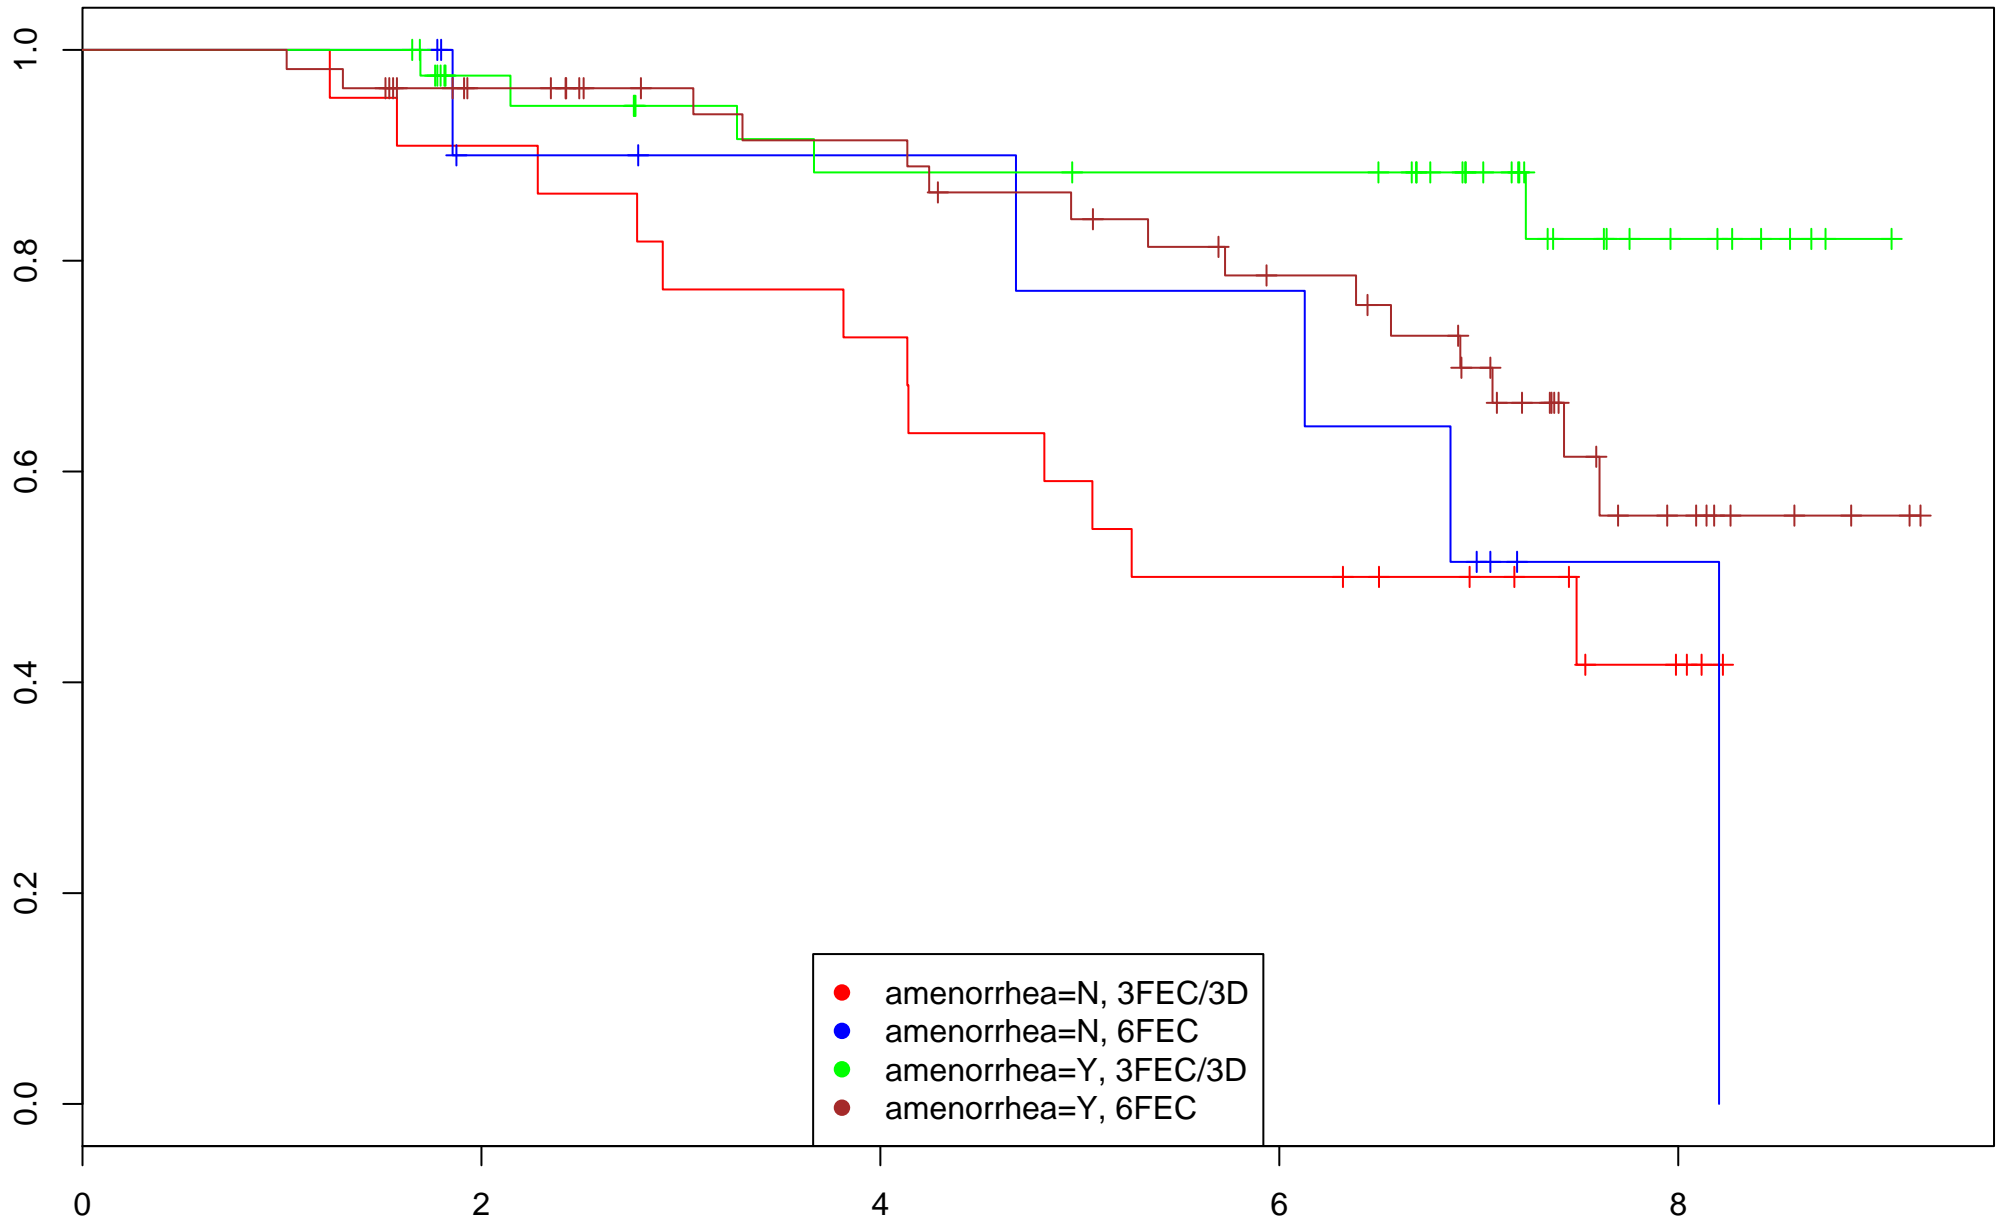

Kaplan-Meier curves

Supplement: MOESM3 [file 9471858]
